# EPIDEMIOLOGIC REVIEWS

---

## POLICY BOARD

Michael J. Klag, *Chair*  
David Celentano  
Bernard Harlow  
Diane Lauderdale  
Rachel Warren

## EDITOR-IN-CHIEF

Michel A. Ibrahim

## EDITORIAL COMMITTEE

Daniel Webster, *Chair*  
Magdalena Cerdá, *Co-Chair*  
Philip Cook, *Co-Chair*  
Garen Wintemute, *Co-Chair*  
Jennifer Ahern  
Anthony Braga  
Jacquelyn Campbell  
John Donohue III  
David Hemenway  
Christopher Koper  
Tracey Meares  
Matthew Miller  
Andrew Papachristos  
Jeffrey Swanson  
Andrés Villaveces

---

## CONSULTANTS

*The Editor-in-Chief thanks the following consultants for their assistance  
in reviewing the papers in this volume.*

Naeemah Abrahams  
Lynn Addington  
Andrew Thomas Anglemyer  
Caleb J. Banta-Green  
Catherine Barber  
Kathleen C. Basile  
Marian Betz  
Renee Butkus  
Patrick M. Carter  
Diana Cheng  
Stephen T. Chermack  
Kenneth R. Conner  
Mark S. Davis  
Emily Douglas  
M. Denise Dowd  
Eric Fleegler  
V. A. Foshee  
Katherine A. Fowler  
Rashna Ginwalla  
Finn Gjertsen  
Tobias Greitemeyer  
David C. Grossman  
Grant Harris  
N. Zoe Hilton

D. A. Hines  
Nathan Irving  
Katherine Iverson  
Sharon Johnson  
Bellal Joseph  
Mensura Junuzovic  
Mark Kaplan  
Philip H. Kass  
Tim Kasser  
Jerome Kassirer  
Arthur L. Kellermann  
D. Lester  
Graham Martin  
Anitha Mathew  
Richard Matzopoulos  
Frank McAndrew  
Emma Elizabeth McGinty  
Katie Mclaughlin  
Samara McPhedran  
Candice M. Monson  
Andrew Page  
W. Pedersen  
Jessamyn Perlus  
Harold Pollack

Kate Prickett  
Megan L. Ranney  
Thomas Reisch  
Callie Rennison  
Emily Faith Rothman  
George W. Rutherford  
Abbas Safavi  
Timothy P. Schofield  
Robert Sege  
Jonathan Shepherd  
Michael Siegel  
Joseph A. Simonetti  
Heidi Stockl  
Richard Taylor  
Stephen Teret  
George Tita  
A. Traylor  
Tyler J. VanderWeele  
Richard Van Dorn  
Lakshmi Vijayakumar  
Steven Weinberger  
Charles Wellford  
Cathy S. Widom
